# Supplementary material
Source: HighWire-hosted journal article supplement (http://www.qdcxjkg.com/highwire/filestream/113061/field_highwire_adjunct_files/0/ERJ_20_1617.pdf)
Supplement: ERJ_20_1617.pdf [file ERJ_20_1617.pdf]

## Authors' correction

**"The Italian multicentre study on noninvasive ventilation in chronic obstructive pulmonary disease patients". E. Clini, C. Sturani, A. Rossi, S. Viaggi, A. Corrado, C.F. Donner, N. Ambrosino, on behalf of the Rehabilitation and Chronic Care Study Group, Italian Association of Hospital Pulmonologists (AIPO). *Eur Respir J* 2002; 20: 529–538.**

Unfortunately, there was an error in the Acknowledgements section on page 537. In the list of Participating centres and investigators the participating centre of Perugia was wrongly named. The corrected name of the participating centre is printed below along with the associated investigators.

Perugia-Terni (M. Dottorini, S. Baglioni, P. Ferranti, R. Tazza)
